# Supplementary material for: Auto-generated iron chalcogenide microcapsules ensure high-rate and high-capacity sodium-ion storage
Source: Royal Society of Chemistry journal article supplement (doi:10.1039/c7nr08255j), 2017-12-06
Supplement: c7nr08255j1.pdf [file c7nr08255j1.pdf]

## Supporting Information

### **Auto-Generated Iron Chalcogenide Microcapsules Ensured High-Rate and High-Capacity Sodium-Ion Storage**

Xusheng Wang,<sup>a,b</sup> Zhanhai Yang,<sup>a</sup> Chao Wang,<sup>b</sup> Luxiang Ma,<sup>b</sup> Chunsong Zhao,<sup>b</sup> Jitao Chen,<sup>b</sup> Xinxiang Zhang<sup>b</sup> and Mianqi Xue<sup>\*a</sup>

<sup>a</sup>Institute of Physics and Beijing National Laboratory for Condensed Matter Physics, Chinese Academy of Sciences, Beijing 100190, China.

<sup>b</sup>Beijing National Laboratory for Molecular Sciences College of Chemistry and Molecular Engineering, Peking University, Beijing 100871, China.

Email: xuemq@iphy.ac.cn

## EXPERIMENTAL SECTION

**Reaction Between the Iron Wires and Selenium/Tellurium Powders.** The iron wires (0.25 mm in diameter and 25 mm in length) were polished before use. Then the iron wires and selenium/tellurium powders were placed at each end of a quartz tube, which was then sealed in the vacuum condition and heated at 500 °C for 150 h to obtain the reaction products.

**Synthesis of the FeSe@FeS, FeS, FeSe, Na<sub>3</sub>V<sub>2</sub>(PO<sub>4</sub>)<sub>3</sub> (NVP), LiCoO<sub>2</sub>, and NCA Materials.**

The iron (Alfa Aesar, 99.9%), sulfur (Alfa Aesar, 99.5%), and selenium (Alfa Aesar, 99.999%) powders were mixed uniformly in a mortar at the molar ratio of 1: 0.75 : 0.25. The mixture was transferred into a quartz tube, which was then sealed in the vacuum condition and heated at 400 °C for 50 h to obtain the FeSe@FeS material. The FeS and FeSe materials were synthesized with the same procedure as comparison. The NVP material was synthesized by using a sol-gel method with NaOH, NH<sub>4</sub>VO<sub>3</sub>, NH<sub>4</sub>H<sub>2</sub>PO<sub>4</sub>, and citric acid as raw materials. The LiCoO<sub>2</sub> and NCA (lithium nickel cobalt aluminum oxide) materials were synthesized by the conventional high-temperature solid-state reaction.

**Synthesis of the Intermediate A, Intermediate B, Fe@FeS, and FeSe/FeS Materials.** The intermediates A and B were selected from the synthesis process in Fig. S5 and taken out of the muffle furnace and cooled to room temperature in a very short time. The Fe@FeS material was prepared with the iron and sulfur powders at a molar ratio of 1 : 0.75 by using the synthesis process in Fig. S5. The FeSe/FeS material was prepared with the Fe@FeS material and Se powders at a molar ratio of 1 (Fe): 0.25 (Se) by using the synthesis process in Fig. S5.

**Material Characterizations.** The crystal structures of FeSe@FeS, Fe@FeS, and FeSe/FeS materials were determined by X-ray diffraction (XRD, PANalytical diffractometer) with Cu K $\alpha$

radiation ( $\lambda = 1.5416 \text{ \AA}$ ) (40 kV, 40 mA). The morphological, elemental-mapping, and microstructural characterizations of FeSe@FeS, FeS, Fe@FeS, and FeSe/FeS materials were visualized by scanning electron microscopy (SEM, S4800, Hitachi) and transmission electron microscopy (TEM, JEM-2100F, JEOL). The thermal stability of the FeSe@FeS material was evaluated by differential scanning calorimetry (DSC, Q100DSC, TA) (DCS1 of METTLER TOLEDO for the LiCoO<sub>2</sub> and NCA materials).

**Preparation of the FeSe@FeS, FeS, FeSe, NVP, LiCoO<sub>2</sub>, and NCA Electrodes.** The low mass-loaded FeSe@FeS electrodes were prepared by mixing the FeSe@FeS powders, carbon black, and sodium carboxymethylcellulose (CMC) at a weight ratio of 8 : 1 : 1. The slurry was spread on a copper foil and then dried in an electric thermostatic drying oven at 90 °C. The dried copper foil was cut into disks (11 mm) as the FeSe@FeS electrodes and then dried in an oven at 80 °C for 12 h under vacuum (the loading is 1.6 mg cm<sup>-2</sup>). The FeS and FeSe electrodes were prepared by the same procedure for comparison. The high mass-loaded FeSe@FeS electrodes were prepared by the similar procedure only with the differences of LA133 binder (acrylonitrile copolymer dispersed in water) as the binder and the weight ratio of 85 : 8 : 7. The NVP electrodes were prepared by mixing the NVP powders (90 wt% of pure NVP and 10 wt% of carbon), carbon black, and polyvinylidene fluoride (PVDF) at a weight ratio of 75 : 15 : 10. The slurry was spread on the aluminum foils and then dried in an electric thermostatic drying oven at 90 °C. The dried aluminum foils were cut into disks (11 mm) as the NVP electrodes and then dried in an oven at 120 °C for 12 h under vacuum. The LiCoO<sub>2</sub>, and NCA electrodes were prepared by the similar procedure only with the difference of the weight ratio of 90 : 5 : 5.

**Electrochemical and Battery Performances of the FeSe@FeS, FeS, FeSe, NVP, LiCoO<sub>2</sub>, and NCA Electrodes.** The electrochemical and half-cell performances of FeSe@FeS, FeS, and

FeSe electrodes were characterized with sodium metal foils as the counter electrodes, glass fibers as the separators, and 1 mol L<sup>-1</sup> sodium trifluoromethanesulfonate (NaCF<sub>3</sub>SO<sub>3</sub>) in diethylene glycol dimethyl ether (DEGDME) as the electrolyte, and then assembled into LIR2032-type coin cells in an argon-filled glove box in which the moisture and oxygen contents were below 0.1 ppm. The half-cell performances of the NVP electrodes were characterized by the similar procedure only with the differences of the sodium metal foils as the anode and 1 mol L<sup>-1</sup> sodium perchlorate (NaClO<sub>4</sub>) in propylene carbonate (PC) with 5 vol% fluoroethylene carbonate (FEC) as the electrolyte. The full-cell performances of the FeSe@FeS electrodes were characterized by the similar procedure only with the differences of the NVP as the cathode and 1 mol L<sup>-1</sup> NaClO<sub>4</sub> in DEGDME as the electrolyte. The LiCoO<sub>2</sub> and NCA electrodes were assembled in the same procedure only with the differences of lithium metal foils as the counter electrodes, Celgard 2400 as the separators, and 1 mol L<sup>-1</sup> lithium hexafluorophosphate (LiPF<sub>6</sub>) in a mixture of ethylene carbonate (EC), dimethyl carbonate (DMC), and ethyl methyl carbonate (EMC) (v : v : v = 1 : 1 : 1) as the electrolyte. The cycling and rate tests of the assembled batteries were performed on a Land CT2001A battery testing system within the voltage range of 0.25-3.0 V *versus* Na<sup>+</sup>/Na (0.01-3.0 V in the Fig. S19c; 2.2-4.0 V for the NVP half cells, and 0.3-2.9 V for the full cells). Cyclic voltammogram (CV) (0.25-3.0 V) and electrochemical impedance spectroscopy (EIS) were measured on an Autolab electrochemical workstation. The cycle number of the cycling performances for the FeSe@FeS half cells in the text starts after several discharge-charge processes, in which a small current density (100-500 mA g<sup>-1</sup>) was used to activate the electrodes to achieve the stable cycling state.

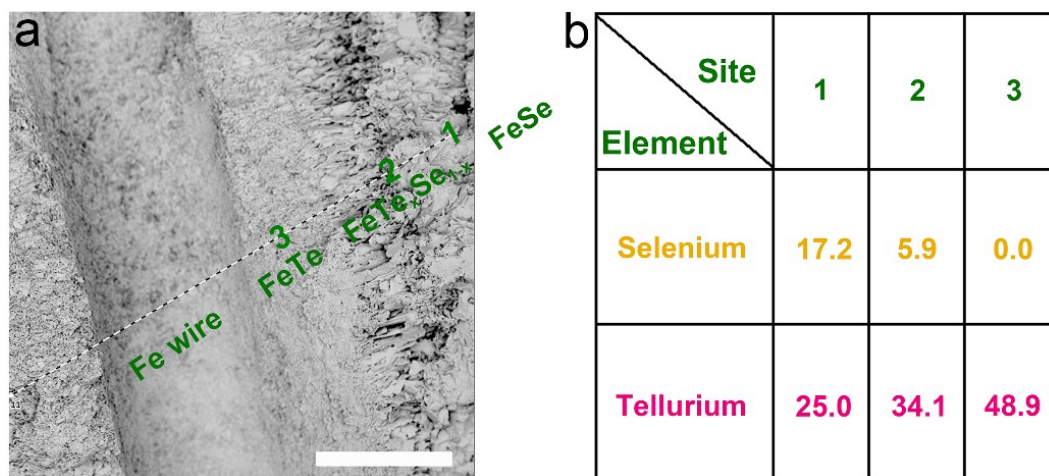

**Fig. S1** (a) SEM image of the reaction products between the iron wires and selenium/tellurium powders. It shows a hierarchical structure: inner FeTe, middle  $\text{FeSe}_x\text{Te}_{1-x}$ , and outer FeSe (with gradually reduced Te component). (b) EDX results of the atomic percents of selenium and tellurium at the sites of 1, 2, and 3 in panel (a). The scale bar is 200  $\mu\text{m}$  in panel (a).

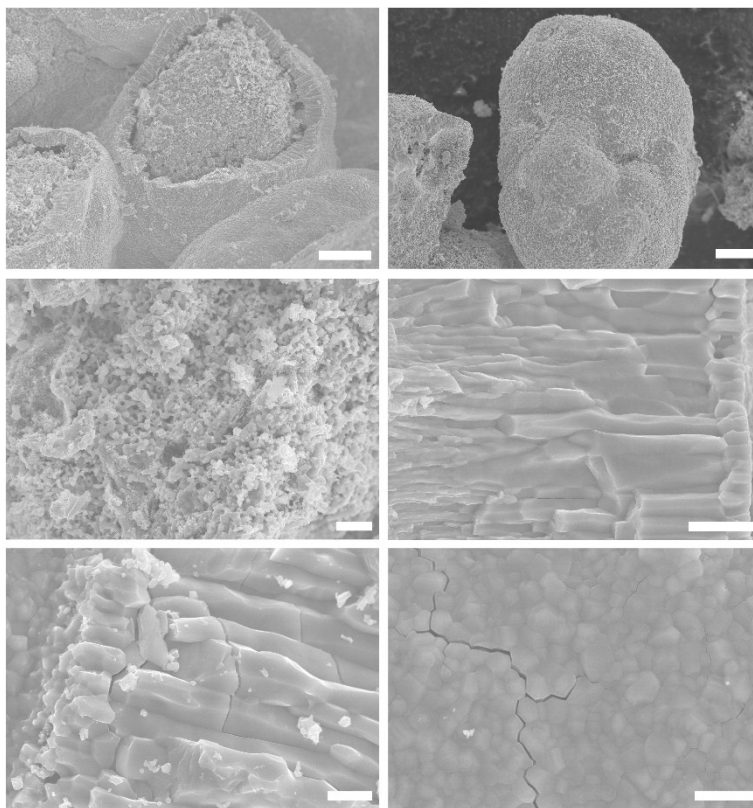

**Fig. S2** (a-d) SEM images of the FeSe@FeS material. (e-f) SEM images of the contrastive FeS material. The morphology of FeS is very similar to that of the shell-encapsulation structure of the FeSe@FeS material. The scale bars are severally 20, 10, 2, 2, 1, and 1  $\mu\text{m}$  in panels (a-f).

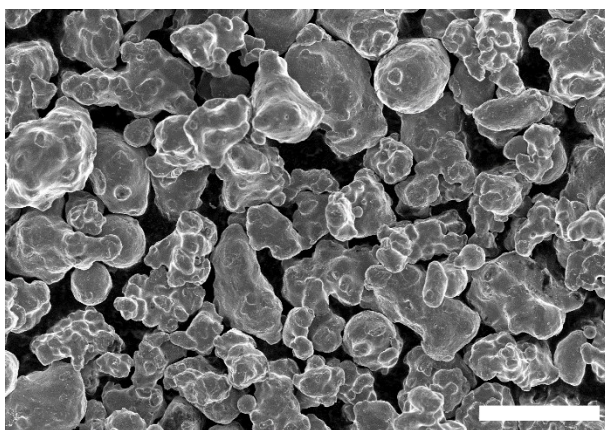

**Fig. S3** SEM image of the raw iron powders. The scale bar is 50  $\mu\text{m}$ .

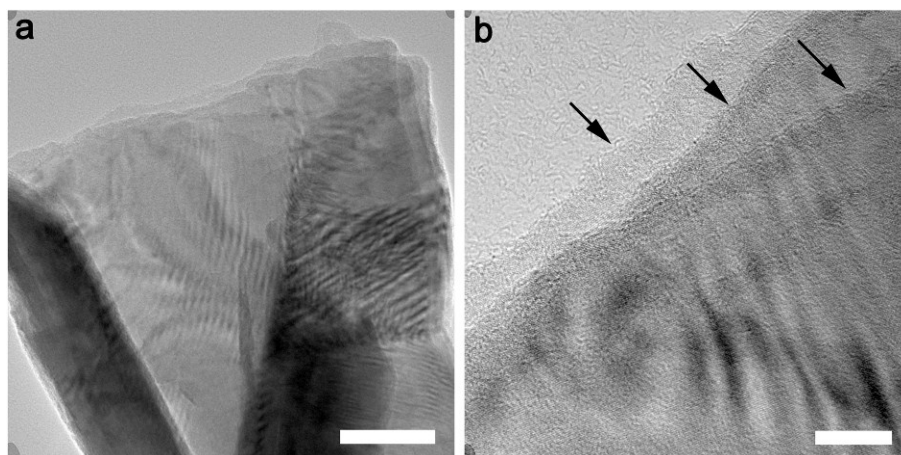

**Fig. S4** TEM images of the FeSe@FeS material. The layered configuration extends energetically along the planar dimensionality. The scale bars in panels (a) and (b) are 50 and 10 nm, respectively.

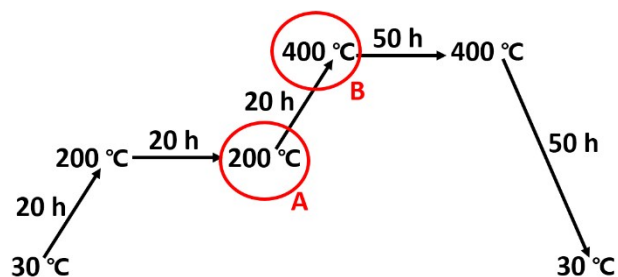

**Fig. S5** Synthesis process of the FeSe@FeS material within five steps.

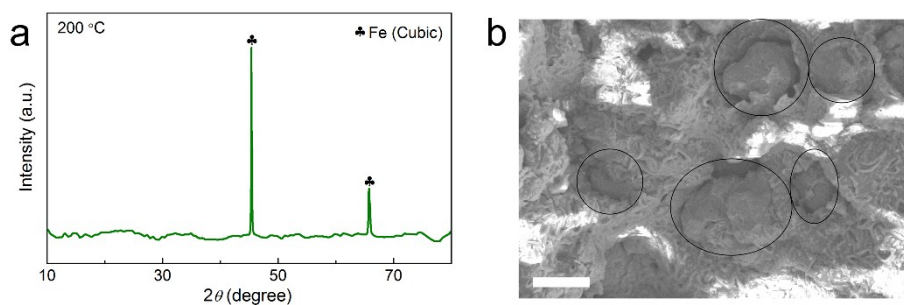

**Fig. S6** (a) XRD pattern of the intermediate A in Fig. S5. (b) SEM image of the intermediate A in Fig. S5. The scale bar is 20  $\mu\text{m}$  in panel (b).



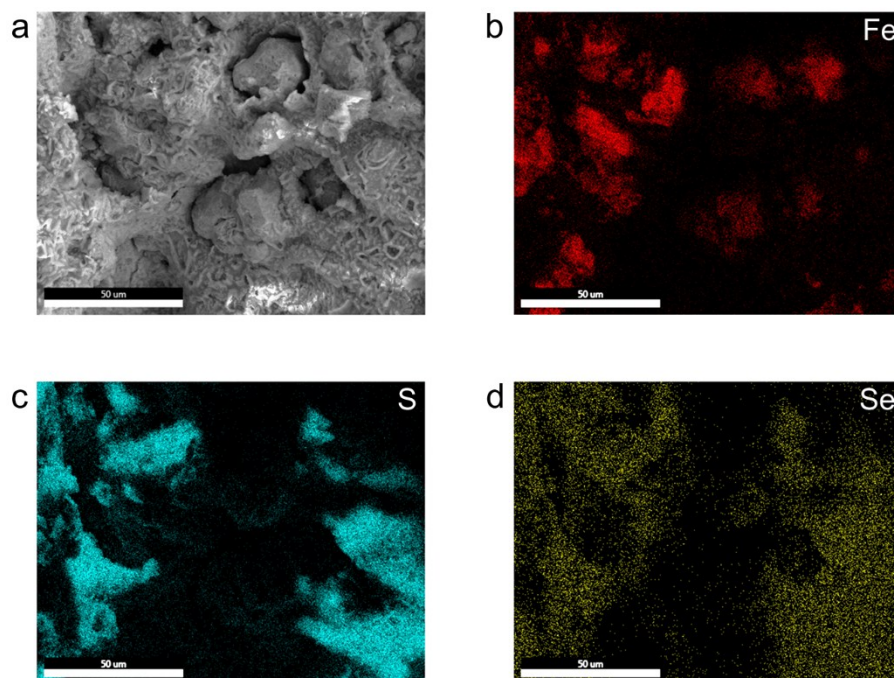

**Fig. S7** EDX images of the intermediate A in Fig. S5.

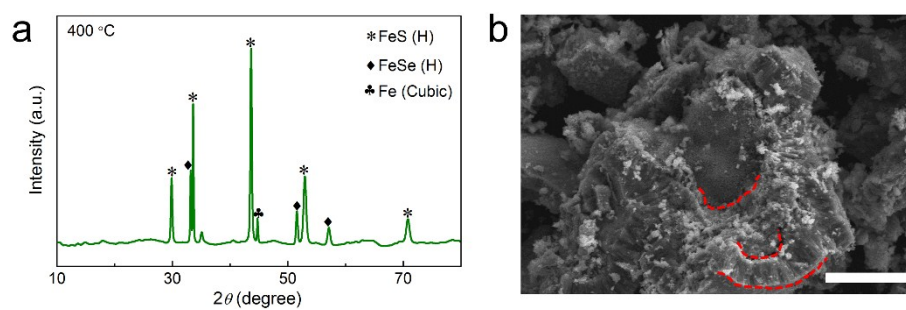

**Fig. S8** (a) XRD pattern of the intermediate B in Fig. S5. (b) SEM image of the intermediate B in Fig. S5. The scale bar is 15  $\mu\text{m}$  in panel (b).



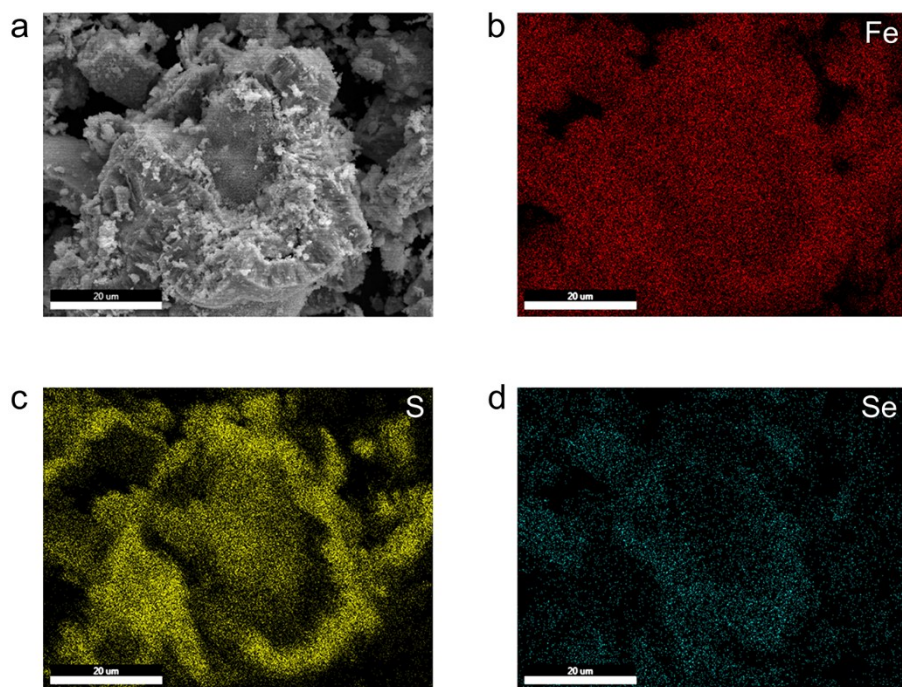

**Fig. S9** EDX images of the intermediate B in Fig. S5.

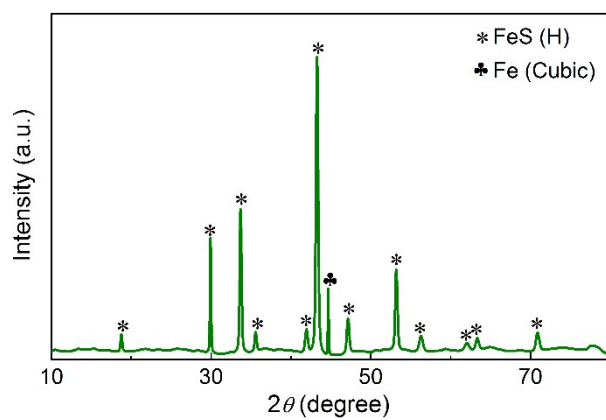

**Fig. 10** XRD pattern of the Fe@FeS product without the introduction of raw Se powders (the initial feeding molar ratio between Fe and S elements is 1 : 0.75).

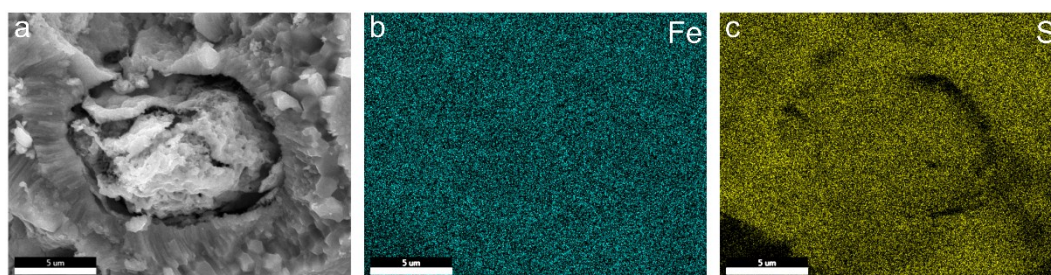

**Fig. 11** SEM and EDX images of the Fe@FeS product without the introduction of raw Se powders (the initial feeding molar ratio between Fe and S elements is 1 : 0.75).

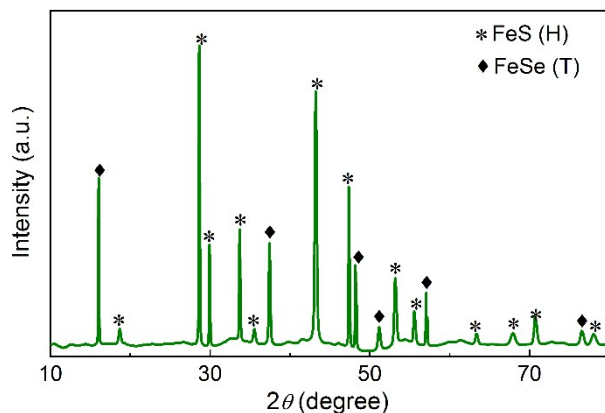

**Fig. 12** XRD pattern of the FeSe/FeS product synthesized by the Fe@FeS product and Se powders (the initial feeding molar ratio between Fe element in the Fe@FeS species and added Se element is 1 : 0.25).

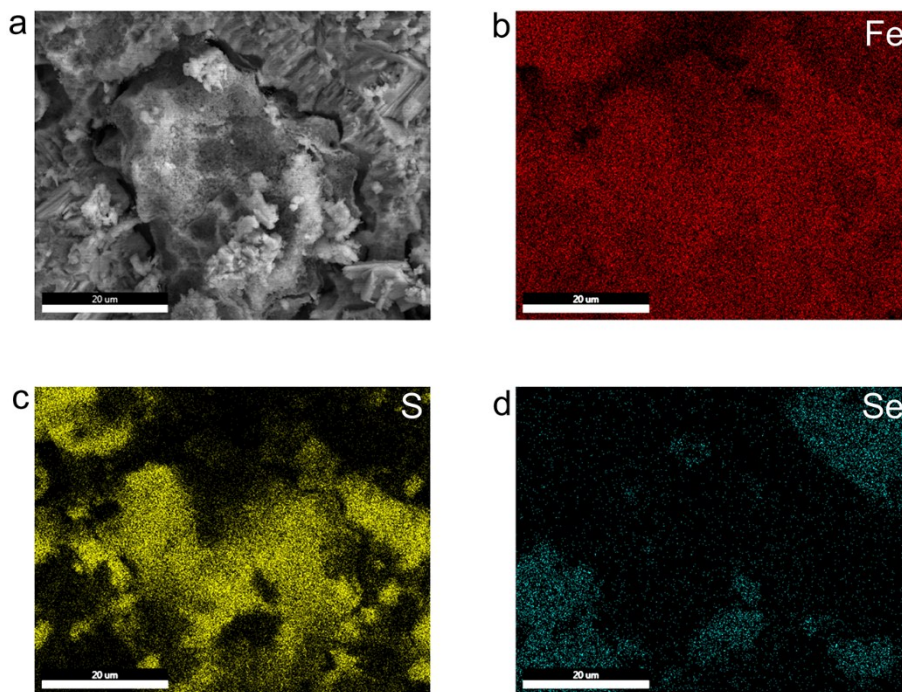

**Fig. 13** SEM and EDX images of the FeSe/FeS product synthesized by the Fe@FeS product and Se powders (the initial feeding molar ratio between Fe element in the Fe@FeS species and added Se element is 1 : 0.25).

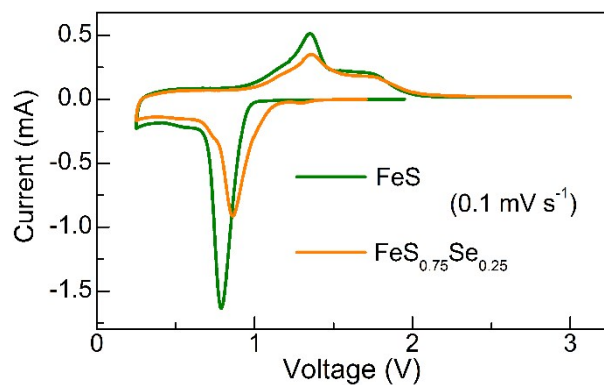

**Fig. S14** CV curves of the first sodiation and desodiation processes for the FeSe@FeS and FeS electrodes. The voltage hysteresis of the FeSe@FeS electrode is smaller than that of the FeS electrode.

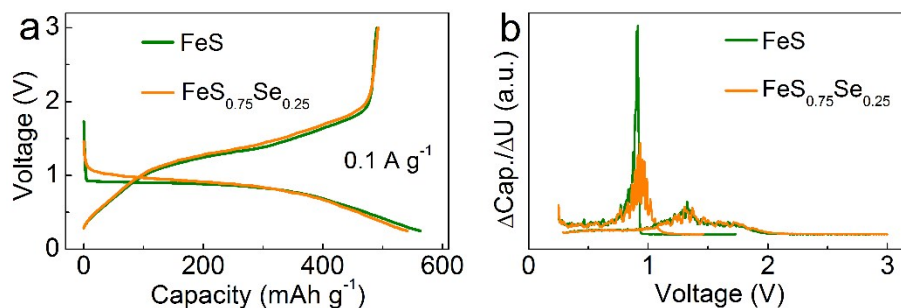

**Fig. S15** (a) Galvanostatic discharge-charge curves of the first sodiation and desodiation processes for the FeSe@FeS and FeS electrodes. (b) Change rates of the discharge capacity and charge capacity along with voltage for the FeSe@FeS and FeS electrodes.

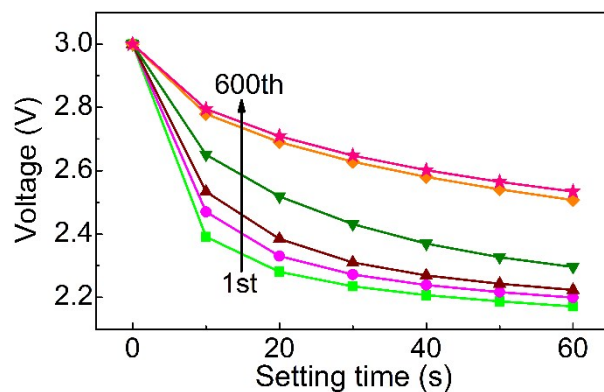

**Fig. S16** Voltage drops of the FeSe@FeS electrode during the setting time. For the node of 60 s, the minimum of the voltage drops is 0.466 V for the 600th cycle.

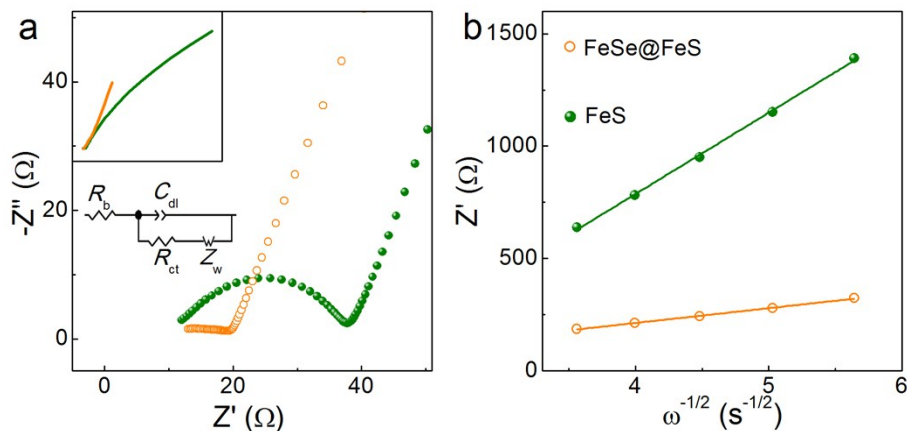

**Fig. S17** (a) EIS patterns of the charged-state FeSe@FeS and FeS electrodes. The inset shows the whole patterns. The simulated values of  $R_{ct}$  for the FeSe@FeS and FeS electrodes are severally 20 and 28  $\Omega$ . (b) Linear relationship of  $Z_{re}$  and  $\omega^{-1/2}$  in the low-frequency region. The fitted  $\sigma$  (Warburg factor) values for the FeSe@FeS and FeS electrodes are separately 66 and 361.

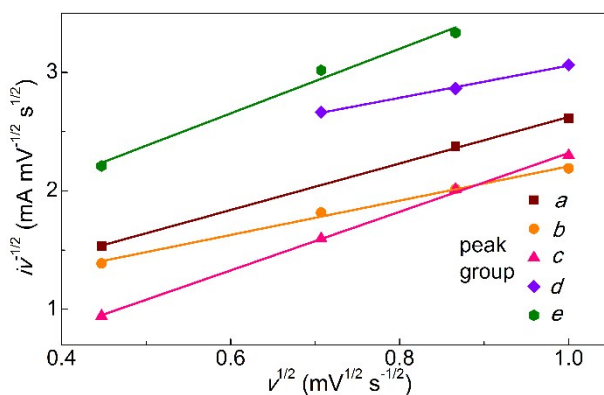

**Fig. S18** Dependence of peak current on the scan rate for the peak groups *a-e* in Fig. 3b. The slopes and intercepts could be used to simulate the contribution of the pseudocapacitive behavior.



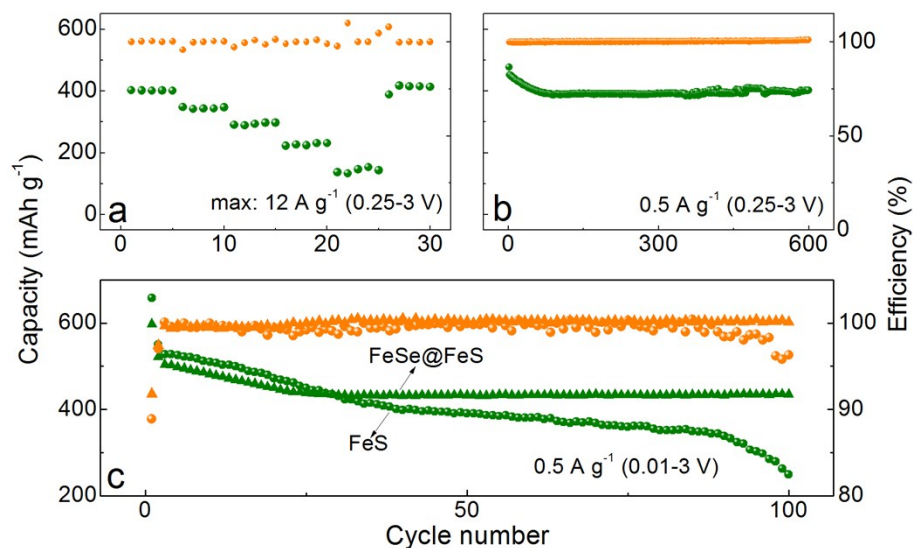

**Fig. S19** (a) Rate capability of the FeS electrodes. A low discharge capacity of 143 mAh g<sup>-1</sup> is delivered at 12 A g<sup>-1</sup> for the FeS electrodes. (b) Cycling performance of the FeS electrodes performed at 0.5 A g<sup>-1</sup>. A discharge capacity of 402 mAh g<sup>-1</sup> is achieved after 600 cycles. (c) Comparison of the cycling performance within the voltage range of 0.01 and 3.0 V between the FeSe@FeS and FeS electrodes. The FeSe@FeS electrodes exhibit better cycling stability than that of the FeS electrodes.

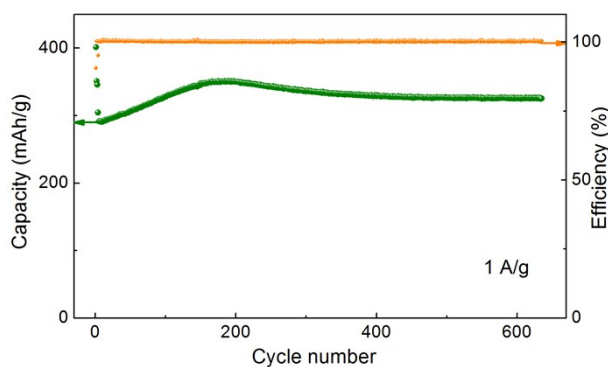

**Fig. S20** Cycling performance of the FeSe material at 1 A g<sup>-1</sup>.

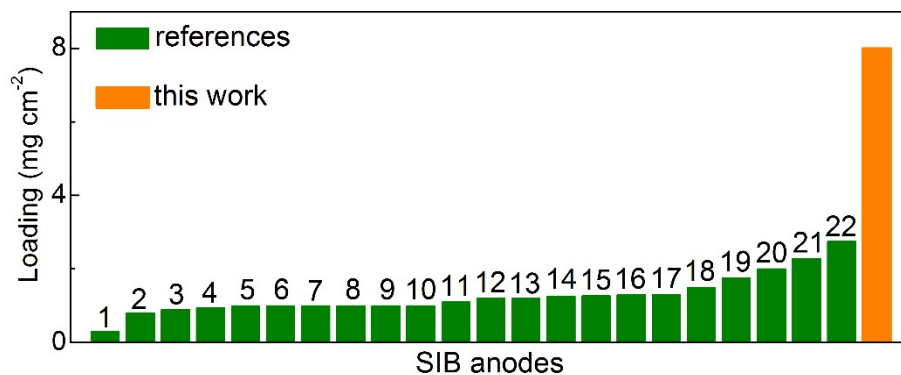

**Fig. S21** Comparison of the loadings between the high mass-loaded FeSe@FeS electrodes (8 mg cm<sup>-2</sup>) and some long-life (over 500 cycles) SIB anodes. References 1-22 severally represents the SnO<sub>2</sub>@C-I, G-NCs, NOC, red P-SWCNT, BPPG,  $\gamma$ -Fe<sub>2</sub>O<sub>3</sub>@C, MoS<sub>2</sub>-G2, SnS<sub>2</sub> NC/EDA-RGO, CoS@rGO, C@SnS/SnO<sub>2</sub>@Gr, GF+V<sub>2</sub>O<sub>3</sub>/CNTs, 3D MoS<sub>2</sub>-graphene, WS<sub>2</sub>@GE, Sb@TiO<sub>2-x</sub>, H-CoS<sub>2</sub>, SbNPs@3D-C, CoSe<sub>2</sub>, Sn NDs@PNC, 8-Sn@C, MFO@C, SnS<sub>2</sub>/rGO, and Mo<sub>3</sub>Sb<sub>7</sub>@C materials.<sup>1-22</sup>

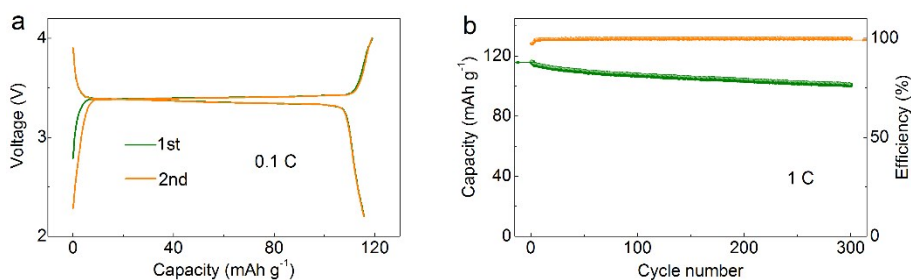

**Fig. S22** (a) Galvanostatic voltage profiles of the NVP half cell (with the simulated theoretical capacity of 100 mAh g<sup>-1</sup>) at 0.1 C between 2.2 and 4.0 V. The initial coulombic efficiency is 97%. (b) Cycling performance of the NVP half cell at 1.0 C between 2.2 and 4.0 V.

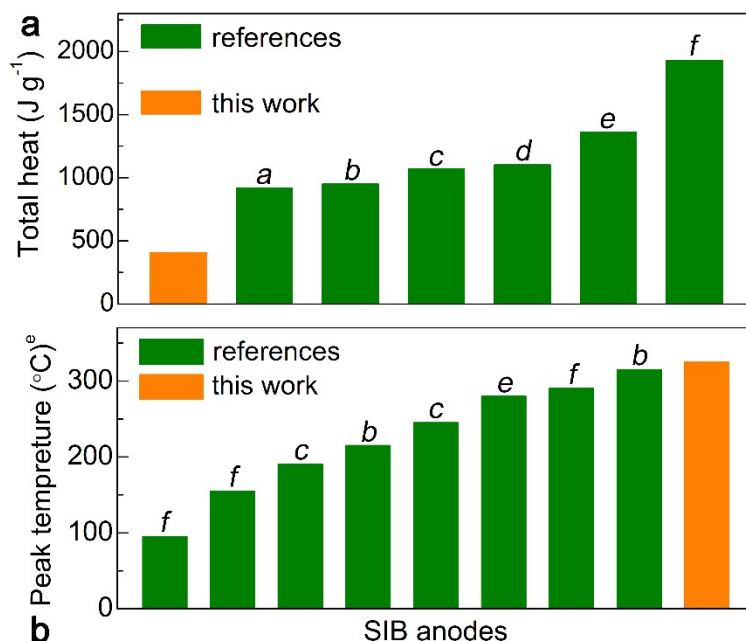

**Fig. S23** Comparisons of the total exothermic heat (a) and exothermic peak temperature (b) (derived from the DSC data) between the high mass-loaded FeSe@FeS electrodes and some published hard carbons. Letters *a-f* separately represents the HC (NaClO<sub>4</sub> in EC + PC), C1600 (NaPF<sub>6</sub> in PC), C1600 (NaPF<sub>6</sub> in EC + DMC), PBHMC (NaClO<sub>4</sub> in EC + PC), C1600 (NaClO<sub>4</sub> in PC), C1600 (NaClO<sub>4</sub> in EC + DMC) (descriptions in the brackets are the electrolyte systems).<sup>23,24</sup> EC: ethylene carbonate; PC: propylene carbonate; DMC: dimethyl carbonate.

## REFERENCES

- 1 A. Jahel, C. M. Ghimbeu, A. Darwiche, L. Vidal, S. Hajjar-Garreau, C. Vix-Guterl and L. Monconduit, *J. Mater. Chem. A*, 2015, **3**, 11960-11969.
- 2 D. Li, L. Zhang, H. Chen, J. Wang, L.-X. Ding, S. Wang, P. J. Ashman and H. Wang, *J. Mater. Chem. A*, 2016, **4**, 8630-8635.
- 3 M. Wang, Z. Yang, W. Li, L. Gu and Y. Yu, *Small*, 2016, **12**, 2559-2566.



- 4 Y. Zhu, Y. Wen, X. Fan, T. Gao, F. Han, C. Luo, S.-C. Liou and C. Wang, *ACS Nano*, 2015, **9**, 3254-3264.
- 5 E. M. Lotfabad, J. Ding, K. Cui, A. Kohandehghan, W. P. Kalisvaart, M. Hazelton and D. Mitlin, *ACS Nano*, 2014, **8**, 7115-7129.
- 6 N. Zhang, X. Han, Y. Liu, X. Hu, Q. Zhao and J. Chen, *Adv. Energy Mater.*, 2015, **5**, 1401123.
- 7 S. Kalluri, K. H. Seng, Z. Guo, A. Du, K. Konstantinov, H. K. Liu and S. X. Dou, *Sci. Rep.*, 2015, **5**, 11989.
- 8 Y. Jiang, M. Wei, J. Feng, Y. Ma and S. Xiong, *Energy Environ. Sci.*, 2016, **9**, 1430-1438.
- 9 S. Peng, X. Han, L. Li, Z. Zhu, F. Cheng, M. Srinivansan, S. Adams and S. Ramakrishna, *Small*, 2016, **12**, 1359-1368.
- 10 Y. Zheng, T. Zhou, C. Zhang, J. Mao, H. Liu and Z. Guo, *Angew. Chem. Int. Ed.*, 2016, **55**, 3408-3413.
- 11 X. Xia, D. Chao, Y. Zhang, J. Zhan, Y. Zhong, X. Wang, Y. Wang, Z. X. Shen, J. Tu and H. J. Fan, *Small*, 2016, **12**, 3048-3058.
- 12 S. H. Choi, Y. N. Ko, J. K. Lee and Y. C. Kang, *Adv. Funct. Mater.*, 2015, **25**, 1780-1788.
- 13 D. Su, S. Dou and G. Wang, *Chem. Commun.*, 2014, **50**, 4192-4195.
- 14 N. Wang, Z. Bai, Y. Qian and J. Yang, *Adv. Mater.*, 2016, **28**, 4126-4133.
- 15 X. Liu, K. Zhang, K. Lei, F. Li, Z. Tao and J. Chen, *Nano Res.*, 2016, **9**, 198-206.
- 16 W. Luo, P. Zhang, X. Wang, Q. Li, Y. Dong, J. Hua, L. Zhou and L. Mai, *J. Power Sources*, 2016, **304**, 340-345.
- 17 K. Zhang, M. Park, L. Zhou, G. H. Lee, W. Li, Y. M. Kang and J. Chen, *Adv. Funct. Mater.*, 2016, **26**, 6728-6735.
- 18 Y. Liu, N. Zhang, L. Jiao and J. Chen, *Adv. Mater.*, 2015, **27**, 6702-6707.
- 19 Y. Liu, N. Zhang, L. Jiao, Z. Tao and J. Chen, *Adv. Funct. Mater.*, 2015, **25**, 214-220.
- 20 Y. Liu, N. Zhang, C. Yu, L. Jiao and J. Chen, *Nano Lett.*, 2016, **16**, 3321-3328.
- 21 Y. Zhang, P. Zhu, L. Huang, J. Xie, S. Zhang, G. Cao and X. Zhao, *Adv. Funct. Mater.*, 2015, **25**, 481-489.

- 22 W. Li, C. Hu, M. Zhou, H. Tao, K. Wang, S. Cheng and K. Jiang, *J. Power Sources*, 2016, **307**, 173-180.
- 23 A. Ponrouch, A. Goñi and M. R. Palacín, *Electrochem. Commun.*, 2013, **27**, 85-88.
- 24 J. Zhao, L. Zhao, K. Chihara, S. Okada, J.-i. Yamaki, S. Matsumoto, S. Kuze and K. Nakane, *J. Power Sources*, 2013, **244**, 752-757.
